# Supplementary material for: Improved performance in TIPS-pentacene field effect transistors using solvent additives
Source: Royal Society of Chemistry journal article supplement (doi:10.1039/c3tc30506f), 2013-01-01
Supplement: c3tc30506f.pdf [file c3tc30506f.pdf]

## Supporting Information

### Improved performance in TIPS-pentacene field effect transistors using solvent additives

Gil Jo Chae,<sup>†</sup> Seung-Hyeon Jeong,<sup>‡</sup> Jeong Hoon Baek,<sup>†</sup> Bright Walker,<sup>§</sup> Chung Kun Song,<sup>‡,\*</sup>  
Jung Hwa Seo,<sup>†,\*</sup>

<sup>†</sup>Department of Materials Physics, Dong-A University, Busan 604-714, South Korea

<sup>‡</sup>Department of Electronics Engineering, Dong-A University, Busan 604-714, South Korea

<sup>§</sup>Department of Interdisciplinary Green Energy, Ulsan National Institute of Science and Technology, Ulsan 689-798, South Korea

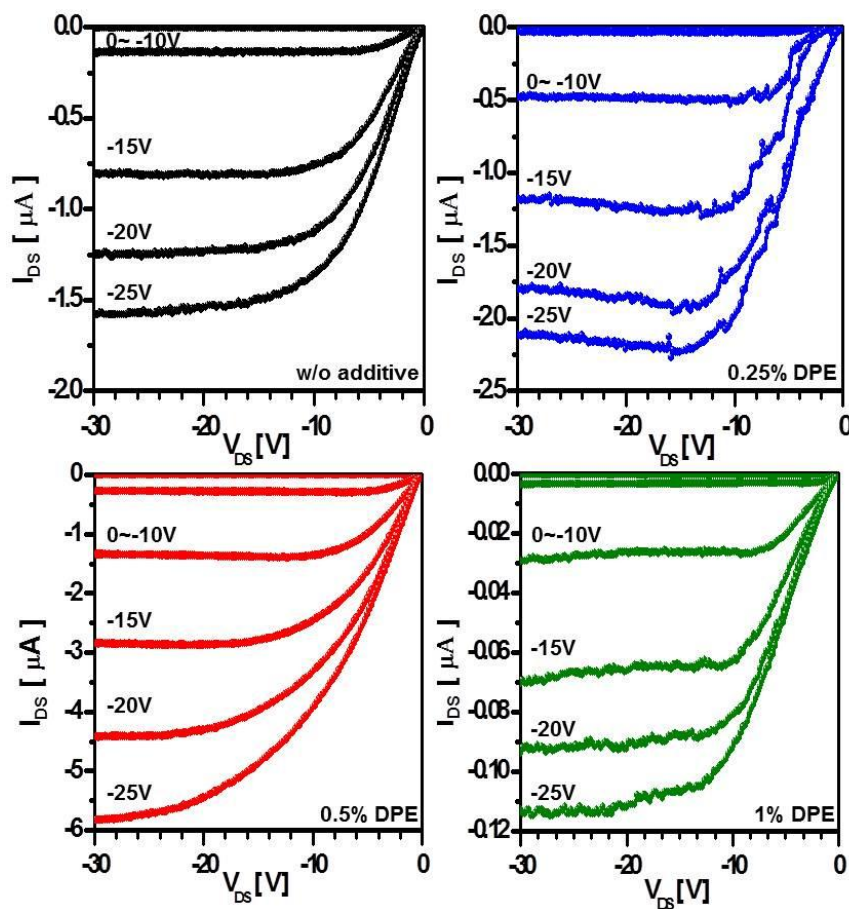

**Figure S1.** Output characteristics of TIPS-pentacene FETs processed using various DPE concentrations.

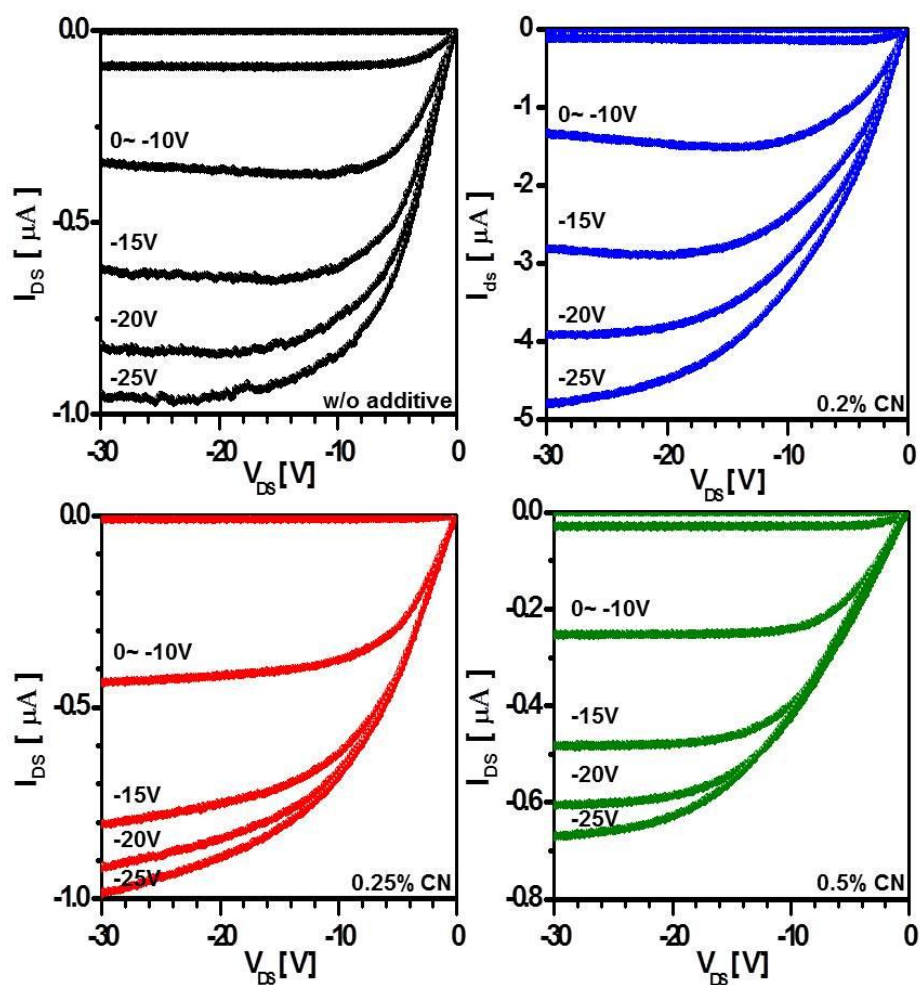

**Figure S2.** Output characteristics of TIPS-pentacene FETs processed using various CN concentrations.

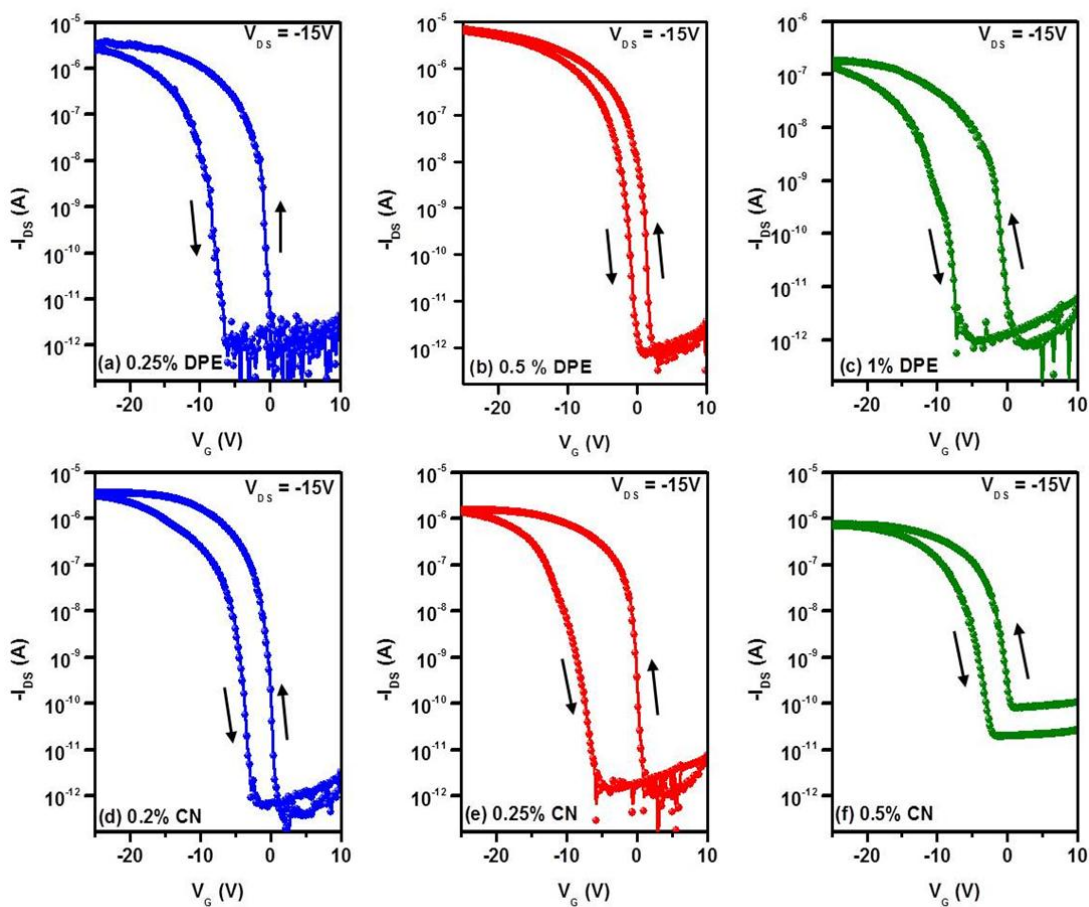

**Figure S3.** Transfer hysteresis characteristics of TIPS-pentacene FETs with various concentration of DPE and CN.

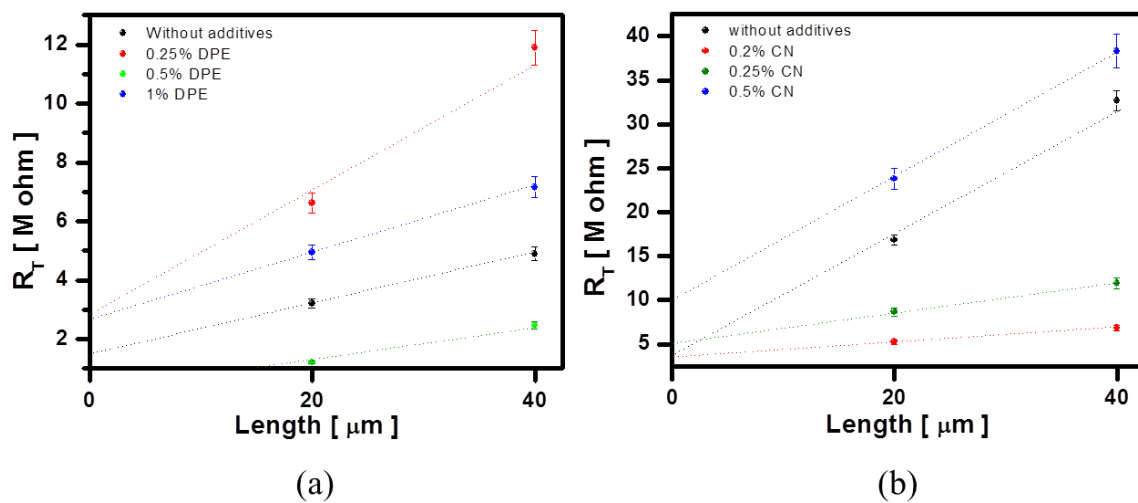

**Figure S4.** Total resistance ( $R_T$ ) vs. channel length of TIPS-pentacene FETs with (a) DPE and (b) CN at different additive concentrations.

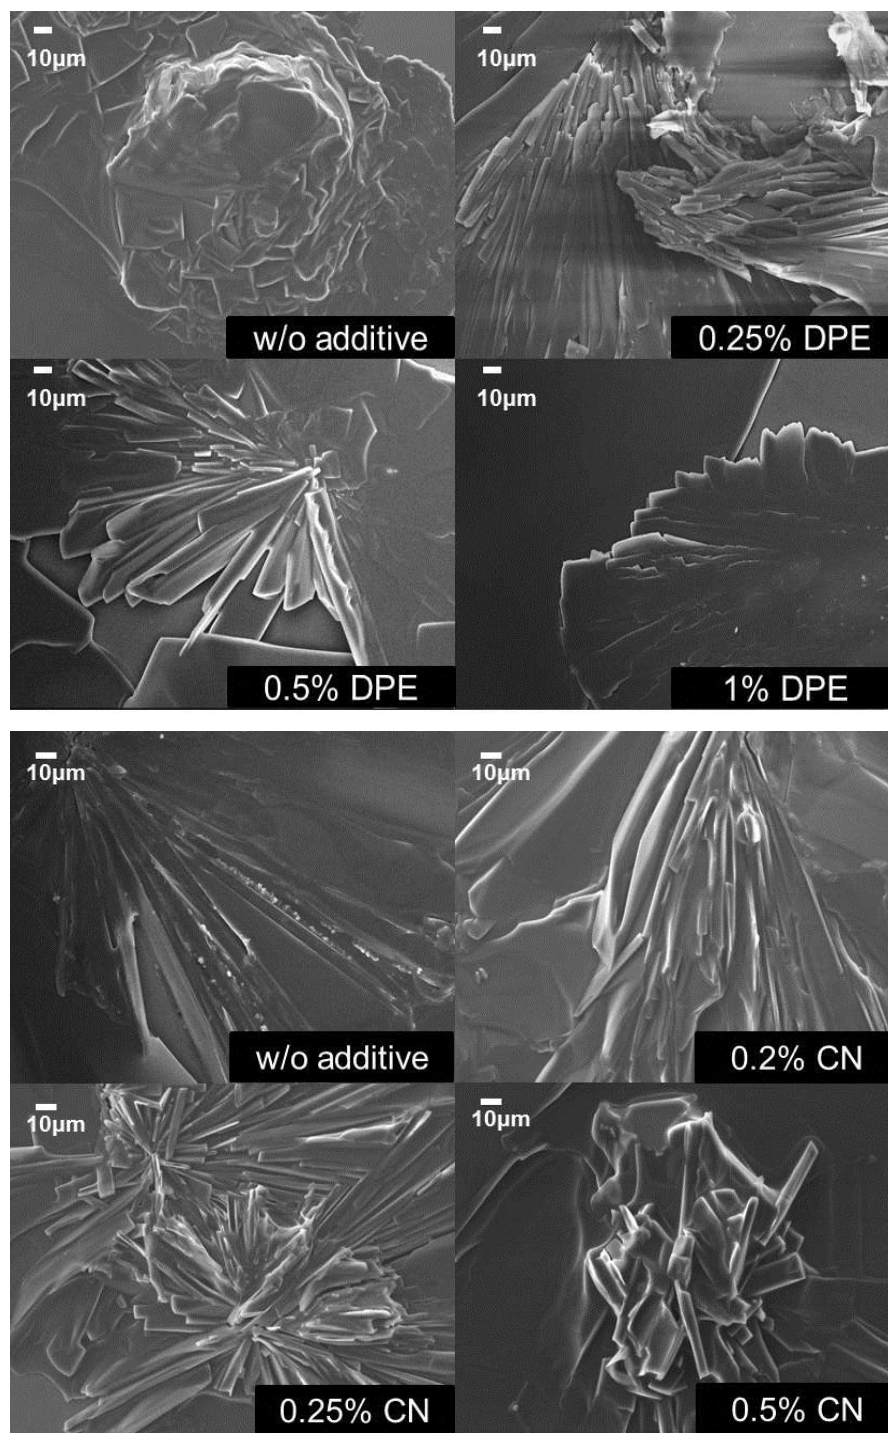

**Figure S5.** SEM images (× 500) of TIPS-pentacene films processed with various DPE (top) and CN (bottom) concentrations.



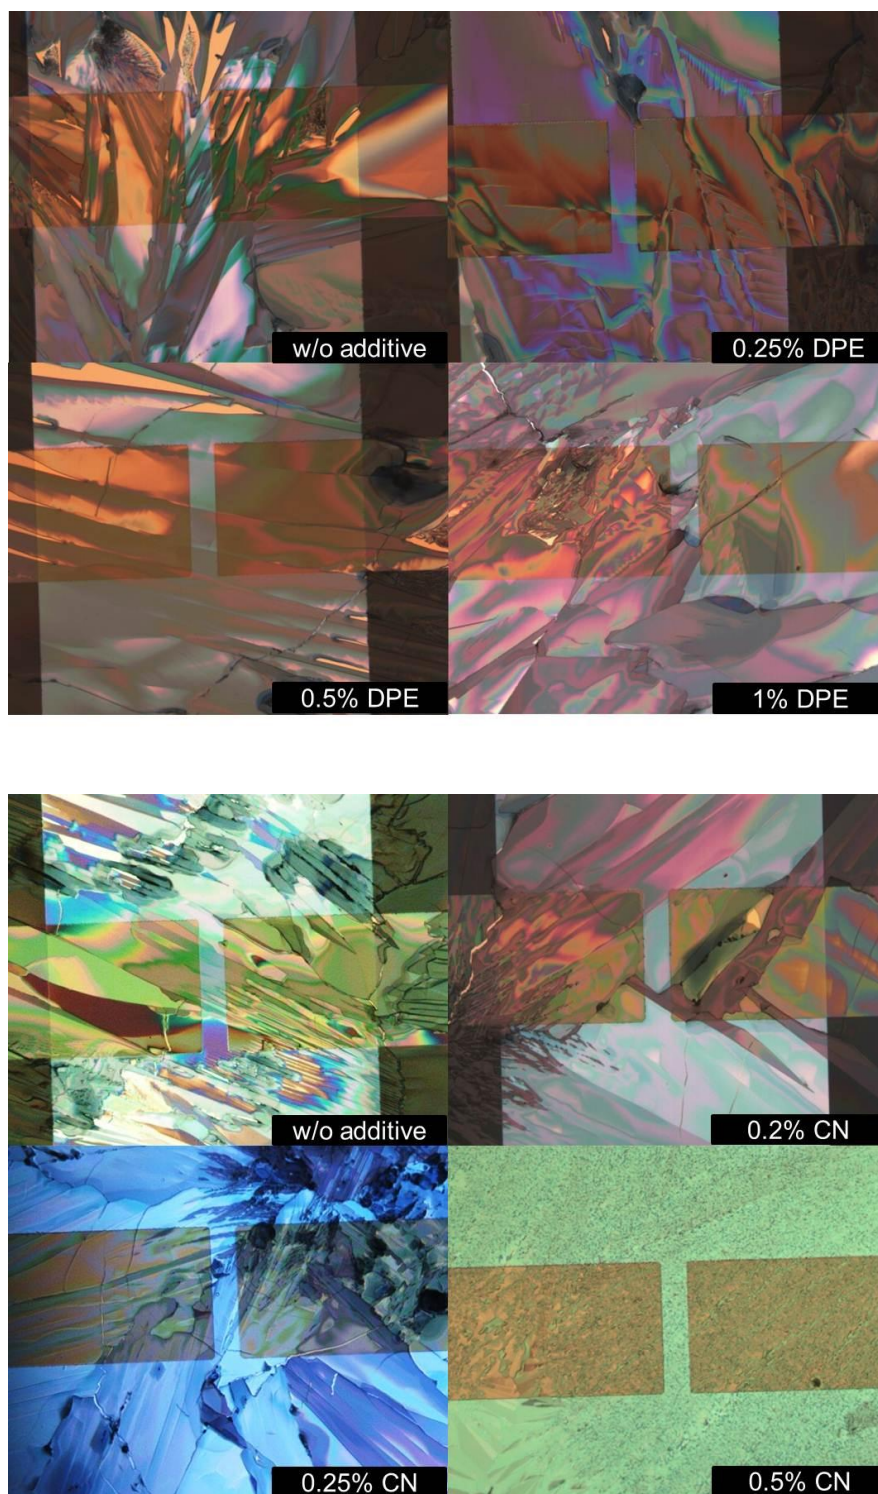

**Figure S6.** Optical microscope images of TIPS-pentacene FETs processed with various DPE (top) and CN (bottom) concentrations.

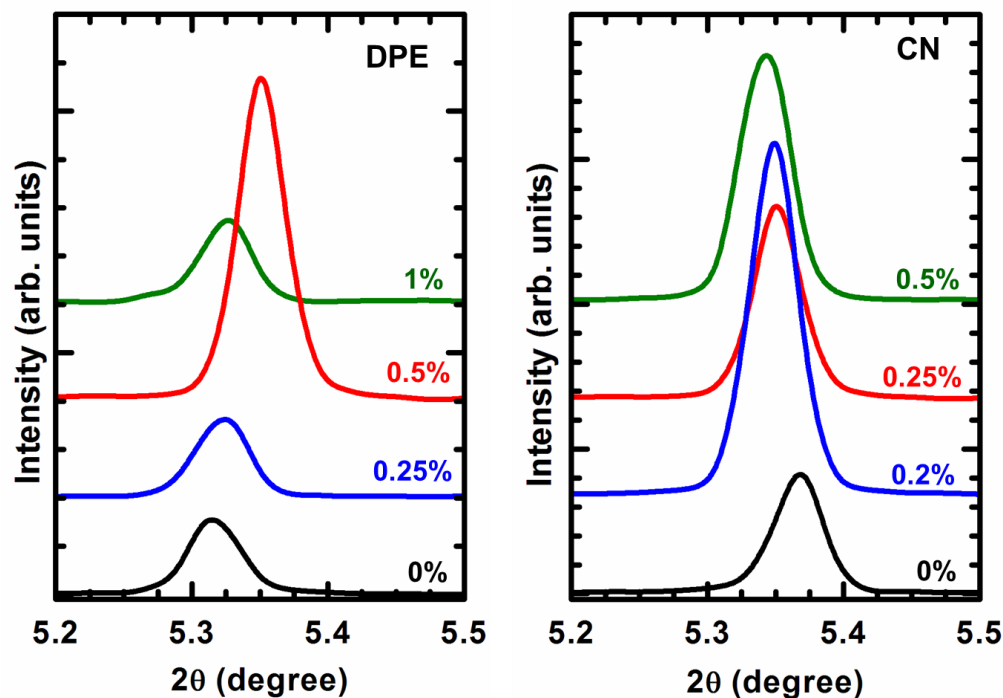

**Figure S7.** XRD (001) peaks for TIPS-pentacene films processed with various concentrations of DPE (left) and CN (right).

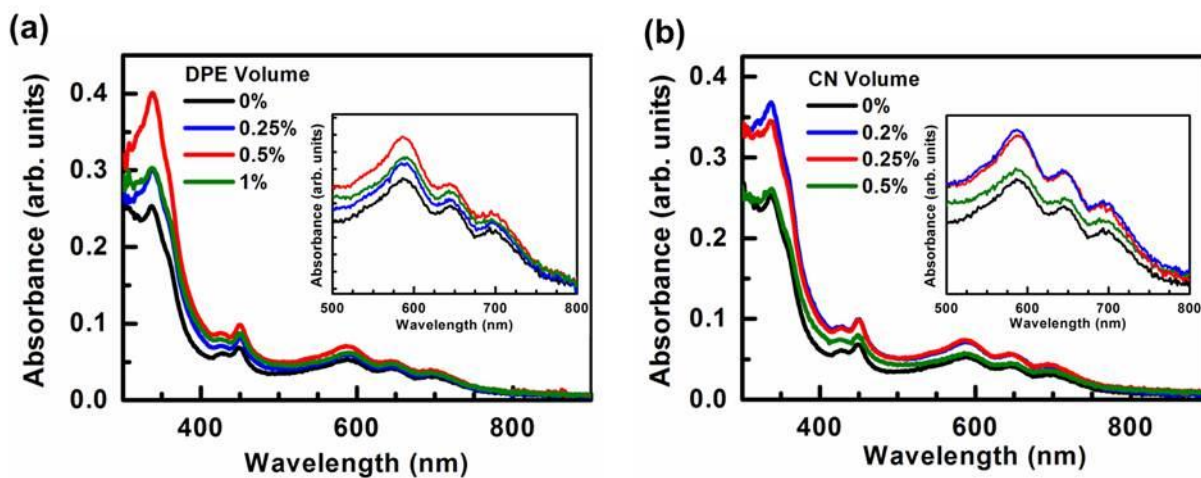

**Figure S8.** UV-Vis absorption spectra of TIPS-pentacene films processed with (a) DPE and (b) CN prepared using different additive concentrations.
